## CORRECTION

# The NAV2 homolog Sickle regulates F-actin-mediated axonal growth in *Drosophila* mushroom body neurons via the non-canonical Rac-Cofilin pathway

**Takashi Abe, Daisuke Yamazaki, Satoshi Murakami, Makoto Hiroi, Yohei Nitta, Yuko Maeyama and Tetsuya Tabata**

There was an error published in the supplementary material accompanying *Development* **141**, 4716-4728.

In Fig. S3B, it should read @29°C. The correct version of the figure now appears online.

The authors apologise to readers for this mistake.
